# Supplementary material for: Using opportunistic sightings to infer differential spatio-temporal use of western Mediterranean waters by the fin whale
Source: PeerJ. 2019 Mar 29;7:e6673. doi: 10.7717/peerj.6673 (PMC6442671; doi:10.7717/peerj.6673)
Supplement: Supplemental Information 1 [file peerj-07-6673-s001.xlsx]

## Sheet: Hoja1
Presences	Season	Latitude	Longitude	Moon phase	DC	CiD	CS	MSR	Year	States of the binary variable (Fin whale presence:1)
Other cetacean	1	35.6158	-3.12832	4	22.8868	48.9662	,00	33.8237	1998	0
Other cetacean	1	35.6836	-3.21852	4	34.0055	59.041	,00	44.3123	1998	0
Other cetacean	1	35.7725	-3.0925	4	34.8561	62.6393	,00	32.591	1998	0
Other cetacean	1	35.7908	-3.46325	4	54.5132	81.8777	,00	29.9426	1998	0
Other cetacean	1	35.8072	-3.48863	4	55.1209	84.7702	,00	27.06	1998	0
Other cetacean	1	35.8512	-3.15262	4	44.3741	71.8814	,00	39.8062	1998	0
Other cetacean	1	35.9	-5.2	4	8.38887	34.1971	,00	12.0242	1998	0
Other cetacean	1	35.9379	-3.70148	4	64.7081	105.733	,00	3.05468	1998	0
Other cetacean	1	35.9483	-5.2975	2	3.93524	23.9778	,00	5.88703	1996	0
Other cetacean	1	35.9483	-5.2975	2	3.93524	23.9778	,00	5.88703	1996	0
Other cetacean	2	35.9517	-3.53333	4	67.8411	98.8041	,00	18.8904	1999	0
Other cetacean	1	35.952	-5.4809	4	4.31672	18.3947	,00	2.97376	1998	0
Other cetacean	2	35.955	-3.58267	4	67.3256	102.132	,00	14.0475	1999	0
Other cetacean	3	35.9567	-5.362	2	3.22248	19.7341	,00	4.15946	1995	0
Other cetacean	4	35.9628	-4.302	3	64.8328	76.2537	,00	18.2755	1997	0
Other cetacean	1	35.9633	-5.3108	2	5.82931	21.9745	,00	4.21687	1996	0
Other cetacean	1	35.97	-5.3017	2	6.12151	22.0614	,00	3.67973	1996	0
Other cetacean	1	35.97	-5.3017	2	6.12151	22.0614	,00	3.67973	1996	0
Other cetacean	1	35.9757	-5.2917	2	6.45905	22.3399	,00	3.25412	1996	0
Other cetacean	3	35.98	-5.3717	4	5.46828	17.2169	,00	1.71734	1996	0
Other cetacean	1	35.9983	-5.31	2	9.01873	19.451	,00	0.761891	1996	0
Other cetacean	3	36	-5.3667	2	7.50012	15.7215	,00	0.19385	1995	0
Other cetacean	1	36.0037	-2.62928	4	65.0789	84.88	,00	6.57104	2007	0
Other cetacean	2	36.0081	-3.01452	2	56.3502	84.5305	,00	30.674	2012	0
Other cetacean	2	36.025	-3.78333	4	70.1032	93.7824	,00	7.16013	1999	0
Other cetacean	2	36.025	-3.73333	4	69.91	97.229	,00	2.34204	1999	0
Other cetacean	2	36.025	-3.59167	4	68.0721	107.658	,00	11.3092	1999	0
Other cetacean	2	36.025	-3.525	4	67.2768	104.25	,00	17.7333	1999	0
Other cetacean	1	36.0317	-5.33547	4	7.91065	15.3147	,00	2.8961	1998	0
Other cetacean	1	36.0333	-5.3	4	8.7871	18.0278	,00	2.56863	1998	0
Other cetacean	1	36.0346	-5.39052	4	5.4116	11.5253	,00	3.95272	1998	0
Other cetacean	4	36.052	-5.36	2	6.11981	12.1306	,00	5.25042	1996	0
Other cetacean	1	36.0738	-3.03475	4	63.0876	91.2818	,00	24.878	1998	0
Other cetacean	1	36.0868	-3.1037	3	65.4463	93.5772	,00	22.6363	1995	0
Other cetacean	1	36.0903	-2.72617	4	59.082	79.2665	,00	5.07757	2007	0
Other cetacean	1	36.0912	-3.3	3	61.519	99.4589	,00	19.4746	1995	0
Other cetacean	3	36.1167	-3.1317	2	62.8324	97.0522	,00	19.2865	1995	0
Other cetacean	3	36.1308	-3.1418	2	61.3907	98.5972	,00	17.7499	1995	0
Other cetacean	3	36.1547	-3.1617	2	58.9847	98.3392	,00	15.1067	1995	0
Other cetacean	1	36.1571	-4.9725	4	30.0775	35.4304	,00	10.2774	1997	0
Other cetacean	3	36.1604	-7.91788	1	80.5643	145.743	,00	9.2244	2004	0
Other cetacean	2	36.1707	-2.91017	2	53.2312	80.6772	,00	17.0185	2008	0
Other cetacean	1	36.1717	-4.07	4	55.4931	64.5912	,00	0.81298	1998	0
Other cetacean	1	36.1753	-2.63667	4	51.2736	68.3965	,00	1.28087	2007	0
Other cetacean	2	36.176	-2.907	2	52.6294	80.0585	,00	16.5343	2008	0
Other cetacean	2	36.1808	-2.6345	3	50.759	67.8147	,00	1.34475	2004	0
Other cetacean	2	36.186	-2.87283	2	50.7831	77.3194	,00	16.0185	2008	0
Other cetacean	1	36.1887	-2.45717	4	54.4859	64.4707	,00	11.4669	2007	0
Other cetacean	1	36.1898	-3.46217	4	50.6114	109.025	,00	7.4565	1998	0
Other cetacean	1	36.2032	-4.10497	4	51.952	60.0699	,00	2.79208	1998	0
Other cetacean	1	36.2043	-2.0545	4	53.3621	74.3008	,00	17.7777	2007	0
Other cetacean	2	36.2118	-2.45953	3	52.2547	62.1623	,00	11.2408	2004	0
Other cetacean	2	36.2412	-2.6325	1	44.7793	61.9619	,00	0	2010	0
Other cetacean	4	36.2415	-5.0893	2	17.0677	33.0522	,00	20.2576	1996	0
Other cetacean	1	36.2548	-2.68933	1	42.8178	62.6053	,00	5.91556	2007	0
Other cetacean	1	36.2672	-3.53297	4	43.2422	99.1421	,00	1.19335	1998	0
Other cetacean	2	36.2836	-2.05208	3	45.6281	67.8661	,00	17.754	2004	0
Other cetacean	3	36.2884	-5.0433	4	15.5062	26.5235	,00	24.2667	2004	0
Other cetacean	3	36.2933	-5.0633	1	14.3119	27.4067	,00	25.0264	1996	0
Other cetacean	2	36.2995	-2.9164	1	40.6475	70.8877	,00	4.17345	2010	0
Other cetacean	2	36.3164	-2.8619	4	37.8874	66.097	,00	3.25667	2010	0
Other cetacean	2	36.3164	-2.8619	4	37.8874	66.097	,00	3.25667	2010	0
Other cetacean	3	36.3167	-4.1892	3	39.728	46.0124	,00	15.2051	1997	0
Other cetacean	3	36.3383	-4.95693	4	12.4508	17.7677	,00	28.004	2004	0
Other cetacean	3	36.3383	-4.95693	4	12.4508	17.7677	,00	28.004	2004	0
Other cetacean	2	36.3517	-4.7417	2	14.1694	20.5068	,00	26.3438	1995	0
Other cetacean	1	36.3528	-3.61968	4	36.6246	87.6096	,00	0.153421	1998	0
Other cetacean	2	36.3563	-2.7178	2	32.5734	54.7063	,00	1.30643	2010	0
Other cetacean	4	36.3638	-4.72733	3	12.9226	20.7068	,00	27.3458	2000	0
Other cetacean	2	36.3682	-3.5682	2	34.0182	91.7238	,00	4.39732	2012	0
Other cetacean	2	36.371	-2.627	4	32.016	49.5057	,00	1.11161	2010	0
Other cetacean	2	36.371	-2.627	4	32.016	49.5057	,00	1.11161	2010	0
Other cetacean	2	36.3835	-3.79626	4	34.6761	70.4215	,00	16.3616	2012	0
Other cetacean	1	36.3848	-2.94617	3	33.0237	66.883	,00	4.69056	2008	0
Other cetacean	1	36.3888	-2.8795	3	31.2952	61.8102	,00	4.16089	2008	0
Other cetacean	1	36.3908	-4.39753	4	22.8629	32.6428	,00	25.4365	1998	0
Other cetacean	2	36.3917	-3.4059	3	30.3974	105.3	,00	11.7532	2011	0
Other cetacean	1	36.393	-2.83183	3	29.7034	58.2829	,00	3.91158	2008	0
Other cetacean	2	36.3948	-3.82924	4	34.3296	66.9836	,00	17.9397	2012	0
Other cetacean	2	36.3948	-2.93717	4	31.8068	65.5449	,00	5.55589	2008	0
Other cetacean	2	36.3997	-2.95	4	31.731	66.1866	,00	6.21276	2008	0
Other cetacean	2	36.4043	-2.95367	4	31.4104	66.1605	,00	6.72582	2008	0
Other cetacean	1	36.4047	-4.74333	4	8.87805	16.9377	,00	31.6118	1998	0
Other cetacean	4	36.4058	-4.2638	4	30.8464	34.6419	,00	25.0648	2000	0
Other cetacean	2	36.4085	-3.016	4	32.9824	70.77	,00	8.00407	2008	0
Other cetacean	2	36.4178	-2.6047	4	27.976	44.3396	,00	2.10584	2010	0
Other cetacean	2	36.4228	-3.035	4	31.7803	71.4657	,00	9.68737	2008	0
Other cetacean	1	36.4412	-3.72965	4	28.2919	74.0191	,00	13.111	1998	0
Other cetacean	1	36.4423	-2.61233	3	25.4069	42.3359	,00	3.49592	2008	0
Other cetacean	2	36.4517	-3.70461	1	27.3695	75.9759	,00	10.979	2012	0
Other cetacean	1	36.4623	-2.589	3	24.2543	39.6184	,00	1.78061	2008	0
Other cetacean	2	36.4629	-3.55333	3	24.5212	89.9865	,00	3.29948	2011	0
Other cetacean	2	36.4654	-3.60841	1	25.3806	84.641	,00	2.07555	2012	0
Other cetacean	2	36.4667	-7	3	62.0162	71.8409	,00	1.63463	2006	0
Other cetacean	2	36.4667	-2.76667	1	21.3933	48.4481	,00	10.3019	2013	0
Other cetacean	1	36.4692	-3.76687	4	25.7402	69.5339	,00	17.4452	1998	0
Other cetacean	3	36.4748	-3.58677	2	24.046	86.4436	,00	0.240149	2009	0
Other cetacean	2	36.481	-3.72817	4	24.3117	72.7716	,00	14.0323	2008	0
Other cetacean	2	36.4817	-2.65167	4	20.6912	40.5387	,00	8.33592	2008	0
Other cetacean	2	36.4817	-2.65167	4	20.6912	40.5387	,00	8.33592	2008	0
Other cetacean	2	36.4817	-2.65167	4	20.6912	40.5387	,00	8.33592	2008	0
Other cetacean	2	36.4868	-3.50483	3	21.1027	94.0353	,00	7.33257	2012	0
Other cetacean	2	36.4925	-3.39109	3	20.4438	100.091	,00	18.1418	2012	0
Other cetacean	2	36.495	-3.34967	1	21.0939	96.1181	,00	21.2039	2008	0
Other cetacean	1	36.4983	-3.1183	2	24.8203	74.7578	,00	18.3177	1995	0
Other cetacean	2	36.499	-3.5955	4	21.8205	84.9525	,00	1.72943	2009	0
Other cetacean	2	36.4998	-2.69	3	18.4278	41.0907	,00	12.5141	2010	0
Other cetacean	1	36.5	-3.41667	3	19.5522	102.252	,00	15.4765	2008	0
Other cetacean	3	36.5	-3.395	2	19.6552	100.207	,00	17.5644	1995	0
Other cetacean	2	36.5005	-3.3785	3	19.8431	98.6352	,00	19.141	2000	0
Other cetacean	2	36.5008	-3.37317	1	19.9159	98.122	,00	19.646	2008	0
Other cetacean	2	36.5099	-3.64982	4	22.0945	79.4234	,00	7.25508	2012	0
Other cetacean	1	35.4727	-2.9255	4	4.42949	30.615	1,00	13.1774	1998	0
Other cetacean	2	36.5218	-3.54083	4	18.538	89.7242	,00	2.92805	2009	0
Other cetacean	2	36.522	-3.4119	3	17.3547	101.103	,00	15.3478	2008	0
Other cetacean	2	36.522	-3.4119	3	17.3547	101.103	,00	15.3478	2008	0
Other cetacean	1	36.5241	-3.83463	4	21.9367	61.3077	,00	25.4423	1998	0
Other cetacean	3	36.5292	-7.63753	3	50.3022	99.6096	,00	15.7565	2004	0
Other cetacean	2	36.5407	-3.42533	3	15.4937	100.684	,00	13.5545	2000	0
Other cetacean	2	36.5423	-2.4353	3	26.0231	29.1404	,00	2.31544	2010	0
Other cetacean	2	36.5477	-2.7065	2	13.4847	38.3899	,00	15.382	1997	0
Other cetacean	3	36.5486	-6.98817	4	58.0447	70.2454	,00	8.95651	2008	0
Other cetacean	3	36.55	-3.4267	2	14.5617	100.39	,00	13.1733	1995	0
Other cetacean	2	36.5525	-3.19383	3	19.5363	79.5082	,00	24.7341	2000	0
Other cetacean	2	36.5583	-3.36	4	14.7855	95.0645	,00	19.3779	1999	0
Other cetacean	2	36.5589	-3.55717	4	15.3656	87.3861	,00	0.363635	2012	0
Other cetacean	2	36.5638	-1.6409	4	45.6492	85.2814	,00	4.2877	2009	0
Other cetacean	3	36.5667	-4.2583	4	14.7543	21.8105	,00	40.9225	1995	0
Other cetacean	4	36.5857	-4.19233	4	12.9446	25.9765	,00	41.888	2000	0
Other cetacean	3	36.59	-4.2527	4	12.3931	20.7194	,00	43.1522	1995	0
Other cetacean	2	36.5903	-3.488	3	10.6289	93.7223	,00	6.18872	2000	0
Other cetacean	2	36.5929	-2.9647	2	14.6035	56.8088	,00	25.553	2010	0
Other cetacean	2	36.5948	-3.6068	4	13.0223	81.8984	,00	5.37889	1995	0
Other cetacean	4	36.5982	-3.8053	3	14.0271	62.2739	,00	24.5976	1997	0
Other cetacean	4	36.6024	-3.7524	3	12.3516	67.4023	,00	19.6123	1997	0
Other cetacean	2	36.6183	-4.2542	2	9.5786	18.9925	,00	45.9756	1995	0
Other cetacean	1	36.6273	-0.524	2	73.7782	92.7729	,00	4.79936	2007	0
Other cetacean	3	36.6345	-8.82178	2	39.3322	197.039	,00	95.195	2004	0
Other cetacean	1	36.6472	-4.0547	2	9.58269	36.8572	,00	46.0671	1995	0
Other cetacean	2	36.6667	-1.33333	2	62.9967	99.68	,00	3.39072	2000	0
Other cetacean	3	36.6681	-8.02342	2	31.2049	122.098	,00	52.7597	2004	0
Other cetacean	1	36.6683	-3.1517	2	7.63903	72.0846	,00	35.6168	1995	0
Other cetacean	2	36.7407	-1.73737	2	25.7532	71.8633	,00	21.2008	2008	0
Other cetacean	2	36.8	-1.88333	2	13.6767	56.7646	,00	18.8725	2000	0
Other cetacean	1	36.8863	-1.4985	1	40.4032	88.0207	,00	23.6557	2004	0
Other cetacean	1	36.8924	-1.33185	4	55.4829	78.8757	,00	11.8556	2004	0
Other cetacean	1	36.9132	-1.6969	4	20.511	75.7323	,00	38.1097	2009	0
Other cetacean	2	36.933	-1.39368	4	48.3351	78.3105	,00	19.1498	2014	0
Other cetacean	3	35.8946	-5.6834	3	6.11459	16.7298	1,00	1.18651	1995	0
Other cetacean	3	36.9382	13.2357	2	41.9636	118.577	,00	619.579	1999	0
Other cetacean	1	36.9537	-0.536667	2	67.6021	78.5658	,00	10.216	2007	0
Other cetacean	1	35.9405	-5.3577	2	1.78541	21.3785	1,00	5.82348	1996	0
Other cetacean	2	36.9821	-0.7069	3	60.8202	67.6871	,00	27.4636	2000	0
Other cetacean	2	35.9481	-3.0343	1	50.5949	78.7929	1,00	30.9806	2010	0
Other cetacean	3	35.9587	-3.0343	2	51.6461	79.8443	1,00	31.2633	1995	0
Other cetacean	4	37	-1.8167	4	6.81817	65.4864	,00	39.5705	1996	0
Other cetacean	1	37.0191	-1.6493	4	21.3793	82.1967	,00	43.7429	2009	0
Other cetacean	1	37.0294	-0.590767	1	58.8386	69.2585	,00	16.5476	2004	0
Other cetacean	2	37.05	-1.66667	3	18.9494	81.2746	,00	47.1177	1999	0
Other cetacean	2	37.05	-1.66667	3	18.9494	81.2746	,00	47.1177	1999	0
Other cetacean	2	37.07	-0.308333	1	67.7923	85.821	,00	10.9479	2009	0
Other cetacean	2	37.07	-0.308333	1	67.7923	85.821	,00	10.9479	2009	0
Other cetacean	2	37.0884	-0.129133	4	78.3613	99.567	,00	28.4867	2000	0
Other cetacean	2	37.1	0.5075	2	78.1901	123.856	,00	91.483	2000	0
Other cetacean	1	37.1082	-0.22625	1	70.0711	90.2815	,00	18.6027	2004	0
Other cetacean	1	37.1285	6.18967	2	13.4406	52.5548	,00	315.946	2000	0
Balaenopteridae	2	37.1312	0.08155	4	92.6096	114.509	,00	48.8383	2000	1
Other cetacean	1	36.11	-5.39	2	4.04906	6.43774	1,00	11.4108	1996	0
Other cetacean	4	37.1633	-0.0752833	2	77.7852	100.759	,00	32.8728	2000	0
Other cetacean	1	37.1658	-0.275	1	62.5322	83.0814	,00	13.0325	2000	0
Other cetacean	4	36.125	-5.3917	2	3.68423	5.88926	1,00	12.9199	1997	0
Balaenopteridae	3	37.1664	-0.292433	2	61.3036	81.57	,00	11.2961	2000	1
Other cetacean	1	37.1684	-1.5082	3	24.1071	67.9532	,00	43.5546	2009	0
Other cetacean	3	37.1718	-0.15105	2	71.2521	93.5983	,00	25.2503	2000	0
Other cetacean	1	36.1358	-5.4083	2	3.01742	4.17729	1,00	14.22	1996	0
Other cetacean	3	37.1776	-0.129183	2	72.6105	95.2887	,00	27.3449	2000	0
Other cetacean	1	37.1863	-1.713	2	8.46265	81.7162	,00	59.7849	1995	0
Other cetacean	2	37.1893	-1.55185	2	19.4469	70.1375	,00	48.1725	2005	0
Other cetacean	4	37.191	-0.188	3	67.1753	89.4336	,00	21.3404	2000	0
Other cetacean	4	37.191	-0.188	3	67.1753	89.4336	,00	21.3404	2000	0
Other cetacean	1	37.1929	-1.11207	3	33.9327	42.7001	,00	16.1804	2004	0
Other cetacean	1	37.1947	-1.11862	3	33.7663	42.7266	,00	16.7863	2004	0
Other cetacean	3	37.1981	-0.06225	2	76.888	100.121	,00	33.7229	2000	0
Other cetacean	1	37.2248	-1.36587	4	24.161	53.5812	,00	36.9583	2014	0
Other cetacean	1	37.2248	-1.36587	4	24.161	53.5812	,00	36.9583	2014	0
Other cetacean	2	37.2351	-0.157	3	66.9634	90.3302	,00	23.8525	2000	0
Other cetacean	2	37.239	-0.0863167	4	72.6635	95.422	,00	30.8145	2000	0
Other cetacean	3	36.2035	-5.25747	4	5.68779	20.4932	1,00	18.8331	2004	0
Other cetacean	1	37.2473	-0.270267	2	57.2557	79.5526	,00	12.4631	2004	0
Other cetacean	1	37.2488	0.483183	2	92.0994	137.254	,00	80.278	2004	0
Other cetacean	2	37.25	-1.56667	2	14.0728	68.0278	,00	53.3908	2001	0
Other cetacean	2	37.2542	-0.164867	4	65.2323	88.8506	,00	22.8287	2000	0
Other cetacean	2	37.2748	-1.32	3	23.1165	46.8081	,00	36.9958	2010	0
Other cetacean	1	37.2823	-0.1875	1	61.7926	85.6891	,00	20.2256	2000	0
Other cetacean	1	37.2823	-0.1875	1	61.7926	85.6891	,00	20.2256	2000	0
Other cetacean	1	37.2833	-1.53333	4	13.0331	63.4648	,00	53.2145	2001	0
Other cetacean	2	37.2861	0.337633	4	100.512	123.632	,00	72.2622	2000	0
Other cetacean	2	37.2861	0.337633	4	100.512	123.632	,00	72.2622	2000	0
Other cetacean	1	37.2983	0.0035	2	77.8193	97.0034	,00	38.9658	2000	0
Other cetacean	1	37.3018	-0.566833	2	34.1929	51.2246	,00	16.3784	2000	0
Other cetacean	2	37.3143	-0.591333	3	31.9719	48.5046	,00	13.7299	2002	0
Other cetacean	3	37.3273	0.4907	4	98.6165	134.488	,00	72.5202	2004	0
Other cetacean	1	37.3299	-0.786	4	25.1605	33.4506	,00	1.59886	2010	0
Other cetacean	2	37.3333	-1.5	1	9.26246	58.1425	,00	54.1719	2001	0
Other cetacean	2	37.3347	-1.14585	2	20.1454	31.1134	,00	28.3029	2008	0
Other cetacean	1	37.3421	-0.400667	2	41.2041	63.7191	,00	1.67904	2004	0
Other cetacean	2	37.3439	-1.48	2	8.55944	55.8807	,00	53.4246	2010	0
Other cetacean	1	37.346	-0.104167	4	66.0451	86.1178	,00	27.6793	2000	0
Other cetacean	4	37.3462	-1.0803	2	18.7671	27.1693	,00	24.2811	1996	0
Other cetacean	2	37.35	-1.43333	2	9.97575	51.4782	,00	50.4186	2001	0
Other cetacean	1	37.3516	0.126333	2	87.3559	102.693	,00	50.4692	2004	0
Other cetacean	3	37.356	0.5268	4	99.5947	136.309	,00	68.7846	2004	0
Other cetacean	1	37.3578	-0.236917	2	53.6537	76.8451	,00	14.3615	2004	0
Other cetacean	2	37.3643	-0.456167	3	35.6652	57.7446	,00	7.4672	2002	0
Other cetacean	1	37.3654	-1.05303	4	17.4843	24.4703	,00	23.5906	2014	0
Other cetacean	1	37.3654	-1.05303	4	17.4843	24.4703	,00	23.5906	2014	0
Other cetacean	2	37.373	-1.34228	1	15.1443	42.4714	,00	45.3075	2005	0
Other cetacean	2	37.3819	-0.469483	2	33.4791	55.822	,00	9.01196	2000	0
Other cetacean	2	37.3833	-0.1333	1	61.8873	81.3988	,00	24.3142	1995	0
Other cetacean	2	37.3869	-0.20165	2	55.4805	76.6675	,00	17.4895	2001	0
Other cetacean	1	36.3489	-5.1117	2	7.7231	27.3829	1,00	31.2046	1996	0
Other cetacean	1	36.35	-5.1167	2	7.56241	27.7417	1,00	31.383	1996	0
Other cetacean	1	37.4055	-0.129067	2	61.4722	80.0713	,00	24.4515	2004	0
Other cetacean	3	37.4091	-0.73435	2	19.0313	31.3724	,00	3.20195	2000	0
Other cetacean	2	37.4097	-0.933067	3	14.6408	19.6827	,00	17.8074	2000	0
Other cetacean	3	37.4149	-0.332583	2	42.5223	66.7967	,00	4.14605	2001	0
Other cetacean	1	37.4156	0.0871	4	81.7337	95.704	,00	45.763	2000	0
Other cetacean	2	37.4167	0.65	2	100.819	144.875	,00	59.5988	2002	0
Other cetacean	2	37.4174	-0.325	2	43.0683	66.9824	,00	4.86569	2001	0
Other cetacean	2	37.424	0.346333	1	106.79	117.178	,00	67.1344	2008	0
Other cetacean	2	37.4242	-0.916	1	13.2046	18.8285	,00	17.5403	2000	0
Other cetacean	4	37.4295	-0.454	2	31.5072	55.6115	,00	8.0831	2000	0
Other cetacean	2	37.433	0.83455	4	96.9206	159.605	,00	50.6834	2000	0
Other cetacean	2	37.4333	-0.2333	1	50.7423	71.068	,00	13.7584	1995	0
Other cetacean	2	37.4333	-0.1333	1	60.1475	77.7865	,00	23.6768	1995	0
Other cetacean	2	37.4333	0.2333	1	95.5294	106.9	,00	60.0376	1995	0
Other cetacean	2	37.4406	4.175	4	53.6111	112.784	,00	129.895	2008	0
Other cetacean	1	37.4426	-0.833717	3	13.3863	21.7187	,00	12.7601	2004	0
Other cetacean	1	37.4438	-0.444167	4	31.475	56.1328	,00	7.29052	2009	0
Other cetacean	3	37.4447	-1.0665	2	9.58779	17.6196	,00	29.967	2002	0
Other cetacean	3	37.4447	-1.0665	2	9.58779	17.6196	,00	29.967	2002	0
Other cetacean	1	37.4479	-1.0505	2	10.0747	16.627	,00	29.014	2010	0
Other cetacean	2	37.4496	-0.384033	4	36.3475	61.1968	,00	1.39914	2000	0
Other cetacean	1	37.4517	0.859833	2	98.2348	160.668	,00	47.857	2000	0
Other cetacean	2	37.4518	-0.1825	3	54.8932	73.0316	,00	18.5611	2004	0
Other cetacean	1	37.455	0.81	4	99.6176	156.339	,00	49.8779	2000	0
Other cetacean	2	37.4608	-0.85875	2	11.5213	18.6834	,00	15.833	2000	0
Other cetacean	2	37.4635	-0.313033	2	42.2153	63.8198	,00	5.46445	2000	0
Other cetacean	1	37.4637	-0.38195	4	35.8967	60.0737	,00	1.37247	2000	0
Other cetacean	3	37.4658	-1.06317	2	7.88078	15.6122	,00	31.1624	2002	0
Other cetacean	3	37.4658	-1.06317	2	7.88078	15.6122	,00	31.1624	2002	0
Other cetacean	3	37.4658	-1.06317	2	7.88078	15.6122	,00	31.1624	2002	0
Other cetacean	2	37.469	-0.533167	2	22.8679	46.884	,00	7.47373	2000	0
Other cetacean	2	36.4286	-4.7472	2	6.49448	15.3721	1,00	34.0356	1996	0
Other cetacean	3	37.4702	-0.5645	2	20.5276	43.8495	,00	5.0975	2002	0
Other cetacean	1	37.4703	0.273867	4	98.8317	108.602	,00	63.5895	2001	0
Balaenopteridae	2	37.4717	-0.13775	2	58.5672	74.7962	,00	22.7461	2001	1
Other cetacean	2	37.474	1.178	4	94.4202	187.042	,00	31.0926	2004	0
Other cetacean	2	37.474	1.178	4	94.4202	187.042	,00	31.0926	2004	0
Other cetacean	2	37.4774	-0.529283	3	22.6279	47.0324	,00	7.19045	2000	0
Other cetacean	2	37.4859	-0.268767	2	45.6264	64.7512	,00	9.56963	2000	0
Other cetacean	2	37.4865	-1.04633	1	7.49121	12.9783	,00	31.3364	2000	0
Other cetacean	2	37.4944	0.27925	2	99.0011	107.965	,00	62.1809	2004	0
Other cetacean	1	37.4961	-0.4887	1	24.9312	50.5428	,00	8.89007	2010	0
Other cetacean	1	37.4961	-0.4887	1	24.9312	50.5428	,00	8.89007	2010	0
Other cetacean	2	37.4978	-0.296617	2	42.6075	62.068	,00	6.65544	2001	0
Other cetacean	2	36.46	-4.76	1	3.38549	12.9658	1,00	37.323	1995	0
Other cetacean	3	36.46	15.423	2	36.0117	63.8796	1,00	824.616	1999	0
Other cetacean	2	37.5082	-0.45235	3	27.6365	52.8274	,00	8.9232	2000	0
Other cetacean	2	37.5122	-0.43135	2	29.4243	53.4301	,00	6.89069	2001	0
Other cetacean	3	37.5133	-0.628333	1	13.1165	36.5426	,00	2.51789	2002	0
Other cetacean	1	37.5172	0.104583	2	81.3871	91.5483	,00	46.2016	2004	0
Other cetacean	1	37.5232	0.0780167	1	78.6726	88.9593	,00	43.4899	2000	0
Other cetacean	2	37.5322	-0.497233	2	22.5644	48.7965	,00	5.80569	2000	0
Other cetacean	1	36.4917	-4.55333	4	7.2923	26.3254	1,00	37.589	1998	0
Other cetacean	1	37.5333	0.0666	3	77.4076	87.4603	,00	42.2288	1995	0
Other cetacean	2	37.55	0.833333	4	108.394	153.206	,00	40.3818	2000	0
Other cetacean	1	37.5516	0.750883	4	110.453	146.096	,00	43.874	2000	0
Other cetacean	1	37.5565	0.197717	1	90.2067	97.899	,00	54.9375	2004	0
Other cetacean	1	36.5333	-4.6067	2	0.558156	26.4076	1,00	42.4531	1996	0
Other cetacean	1	36.5342	-4.6036	2	0.772605	26.1224	1,00	42.4991	1998	0
Other cetacean	1	36.5342	-4.6036	3	0.772605	26.1224	1,00	42.4991	1998	0
Other cetacean	2	37.5803	1.61818	3	102.874	165.003	,00	1.21975	2002	0
Other cetacean	1	36.5417	-4.61667	1	0.730992	26.5754	1,00	43.42	1998	0
Other cetacean	3	36.5417	-4.6167	1	0.735588	26.5757	1,00	43.4238	1995	0
Other cetacean	3	36.5417	-4.6167	4	0.735588	26.5757	1,00	43.4238	1997	0
Balaenopteridae	2	36.5417	-4.6167	2	0.735588	26.5757	1,00	43.4238	1997	1
Other cetacean	1	37.5845	0.597767	2	116.736	131.513	,00	44.8662	2004	0
Other cetacean	3	37.5908	0.950167	1	110.386	161.438	,00	31.3364	2004	0
Other cetacean	2	37.5929	0.1315	1	83.3628	90.3537	,00	47.7684	2004	0
Other cetacean	1	37.593	-0.153	3	54.9581	65.8493	,00	19.6869	2000	0
Other cetacean	1	37.593	-0.153	3	54.9581	65.8493	,00	19.6869	2000	0
Balaenopteridae	2	36.5667	-4.55	4	1.1191	20.0668	1,00	44.9733	1997	1
Other cetacean	3	36.5667	-4.3833	2	12.4319	15.3634	1,00	42.6584	1995	0
Other cetacean	1	37.6097	0.506333	2	109.718	122.6	,00	44.9191	2004	0
Other cetacean	1	36.569	-4.541	2	0.988459	19.3039	1,00	45.0761	1995	0
Other cetacean	2	37.617	-0.46635	3	23.5327	42.5729	,00	2.30167	2000	0
Other cetacean	2	37.6191	-0.32055	2	38.0888	51.4056	,00	2.73542	2000	0
Other cetacean	3	37.6256	-0.286867	4	41.4416	53.4014	,00	5.99404	2001	0
Other cetacean	3	37.6282	-0.3644	3	33.6857	47.7324	,00	1.72939	2000	0
Other cetacean	3	37.6295	-0.345017	4	35.6231	48.9535	,00	0.176344	2000	0
Other cetacean	3	37.6295	-0.345017	4	35.6231	48.9535	,00	0.176344	2000	0
Other cetacean	2	37.6298	-0.300933	1	40.0312	52.0784	,00	4.54509	2000	0
Other cetacean	2	37.638	1.16667	2	102.681	179.053	,00	17.0981	2002	0
Other cetacean	2	37.65	1.33333	4	99.0693	193.423	,00	8.28969	2002	0
Other cetacean	2	37.6624	-0.246383	3	45.5918	54.2157	,00	9.54019	2004	0
Other cetacean	2	37.6667	0.1	2	80.2021	84.4919	,00	40.443	2003	0
Other cetacean	2	37.6707	0.00302167	4	70.5364	75.4203	,00	33.0597	2008	0
Other cetacean	3	37.6728	-0.175433	3	52.7442	59.5309	,00	16.4445	2000	0
Other cetacean	1	36.6361	-4.352	4	8.43145	10.3322	1,00	49.0948	1998	0
Other cetacean	2	37.683	-0.399867	2	30.5775	41.2969	,00	2.6883	2000	0
Other cetacean	1	37.6833	0.6167	1	108.884	127.774	,00	34.84	1996	0
Other cetacean	1	37.6833	0.6167	1	108.884	127.774	,00	34.84	1996	0
Other cetacean	2	37.6901	-0.267	1	43.8201	50.9234	,00	7.14199	2007	0
Other cetacean	2	37.6905	0.0249	2	72.8549	76.6385	,00	33.3167	2009	0
Other cetacean	3	36.6651	-3.4415	3	3.06595	97.6529	1,00	8.6707	2008	0
Other cetacean	1	36.6667	-3.33333	4	6.37486	89.8919	1,00	19.052	2009	0
Other cetacean	2	37.7091	0.2697	4	89.966	97.8113	,00	41.7727	2007	0
Other cetacean	2	37.7167	0.183333	2	84.4449	90.6765	,00	43.1508	2003	0
Other cetacean	4	36.676	-4.24	1	3.72938	18.1287	1,00	51.4925	1995	0
Other cetacean	2	36.6833	-6.61233	4	18.1453	36.8807	1,00	13.28	1996	0
Other cetacean	1	36.6842	-4.394	2	3.89918	3.95962	1,00	54.4431	1995	0
Other cetacean	2	37.7281	0.382517	2	93.2097	105.641	,00	36.8838	2001	0
Other cetacean	2	37.7294	0.27835	2	88.4372	97.2048	,00	39.5841	2004	0
Other cetacean	2	37.7344	0.428483	3	95.0201	109.095	,00	35.0331	2001	0
Other cetacean	4	36.696	-4.4058	4	2.65452	2.33494	1,00	55.7755	2000	0
Other cetacean	1	37.7463	8.20295	3	78.8837	95.9919	,00	310.018	2002	0
Other cetacean	2	37.75	-0.0667	1	63.2337	65.9304	,00	22.5549	1995	0
Other cetacean	2	37.75	-0.0667	1	63.2337	65.9304	,00	22.5549	1995	0
Other cetacean	2	37.75	0.216667	2	84.2218	91.1196	,00	39.2771	2003	0
Other cetacean	2	37.7505	0.5728	2	100.874	120.627	,00	29.562	2001	0
Other cetacean	2	37.7637	0.112833	4	75.9767	82.4582	,00	34.786	2009	0
Balaenopteridae	3	37.7654	-0.0138667	4	65.99	70.4051	,00	25.3815	2000	1
Other cetacean	2	37.7667	-0.3	3	41.8651	44.0328	,00	2.89279	2000	0
Other cetacean	2	37.7703	-0.0663333	3	61.8376	65.2731	,00	21.1988	1999	0
Other cetacean	2	37.7703	-0.0663333	3	61.8376	65.2731	,00	21.1988	1999	0
Other cetacean	2	37.7703	-0.0663333	3	61.8376	65.2731	,00	21.1988	1999	0
Other cetacean	2	37.7811	0.602183	2	99.7233	121.793	,00	25.8242	2001	0
Other cetacean	2	37.8036	0.65805	2	100.9	125.832	,00	22.1393	2001	0
Other cetacean	2	37.8165	1.08398	2	87.8012	165.033	,00	5.13428	2001	0
Other cetacean	2	37.8173	0.511217	1	92.0651	112.046	,00	24.8073	2001	0
Other cetacean	2	37.8261	0.58375	1	94.9242	118.15	,00	21.9902	2004	0
Other cetacean	1	37.833	0.45	2	87.9369	105.898	,00	24.956	1995	0
Other cetacean	1	37.8417	0.51	2	89.8561	110.834	,00	22.4903	1995	0
Other cetacean	2	37.8516	0.652717	2	96.6875	123.397	,00	17.6658	2004	0
Other cetacean	3	37.8547	-0.031	4	58.9929	65.8555	,00	18.0504	2001	0
Other cetacean	2	36.8158	-6.50848	2	9.25414	37.4397	1,00	25.7959	1995	0
Other cetacean	2	37.8678	0.266267	2	75.4041	88.2413	,00	26.5963	2001	0
Other cetacean	1	37.868	1.48017	2	77.5123	191.97	,00	17.837	2002	0
Other cetacean	2	37.8767	0.598633	3	91.5103	117.439	,00	16.7194	2004	0
Balaenopteridae	1	37.8778	-0.172333	1	46.7433	52.1777	,00	6.11656	1998	1
Other cetacean	2	37.8806	0.64495	2	93.8925	121.571	,00	15.0806	2004	0
Other cetacean	2	37.8925	1.38032	4	74.6366	191.509	,00	15.3628	2002	0
Other cetacean	2	36.866	-6.51837	3	7.89494	42.1026	1,00	30.8695	1997	0
Other cetacean	1	37.9153	0.210933	1	68.7126	81.0389	,00	23.5199	2004	0
Other cetacean	1	37.9167	0.85	1	90.0103	139.691	,00	6.04433	1996	0
Other cetacean	1	37.9218	1.30127	4	72.3174	183.143	,00	14.2892	2003	0
Other cetacean	2	37.9219	1.21703	4	73.897	174.944	,00	10.3803	2004	0
Other cetacean	1	37.9333	0.35	2	74.0922	92.4362	,00	18.0132	2002	0
Other cetacean	2	37.9388	2.67383	3	115.961	122.57	,00	79.585	2004	0
Other cetacean	2	36.9	-6.45	4	0.306561	41.7998	1,00	33.8022	1997	0
Other cetacean	1	37.9427	8.16637	3	98.6888	112.276	,00	290.732	2002	0
Other cetacean	1	37.9427	8.16637	3	98.6888	112.276	,00	290.732	2002	0
Other cetacean	3	36.9035	-6.54363	3	7.06379	46.6285	1,00	34.695	1996	0
Other cetacean	2	37.9455	1.1736	4	72.7309	170.171	,00	10.4543	2004	0
Other cetacean	2	37.9466	0.0686167	3	60.9822	67.3971	,00	19.1042	2004	0
Other cetacean	2	37.9508	2.69083	4	116.767	123.193	,00	81.4376	2000	0
Other cetacean	2	37.958	0.73535	2	92.7779	127.518	,00	5.1825	2004	0
Other cetacean	2	37.9657	0.80045	3	89.2595	133.538	,00	2.6698	2004	0
Other cetacean	1	37.9667	0.8167	3	88.1335	135.074	,00	2.13574	1996	0
Other cetacean	2	37.9833	0.533333	1	79.0235	107.523	,00	8.2253	2006	0
Other cetacean	2	37.9903	-0.0375167	4	51.4483	56.2536	,00	8.35179	2006	0
Other cetacean	3	36.9525	-6.87333	1	18.1929	30.7188	1,00	7.84874	1997	0
Other cetacean	2	38	0.383333	2	69.9881	92.8559	,00	10.6921	2003	0
Other cetacean	2	38	0.533333	1	77.6634	106.992	,00	6.62119	2006	0
Other cetacean	1	38.001	1.63653	2	65.2676	186.509	,00	36.8772	2009	0
Other cetacean	2	38.0167	0.3	2	64.4023	84.4919	,00	11.3496	2006	0
Other cetacean	2	38.0167	0.5	1	74.3862	103.306	,00	5.92173	2006	0
Other cetacean	2	38.0167	0.0833	4	54.6775	64.9099	,00	15.4103	1995	0
Other cetacean	1	36.9763	-6.63683	4	5.4231	41.5893	1,00	22.8741	1998	0
Other cetacean	2	38.0405	0.8745	3	78.7653	138.905	,00	6.53594	2001	0
Other cetacean	2	38.05	3.18333	4	108.876	128.111	,00	113.107	2006	0
Other cetacean	4	37.011	-6.67572	4	4.36967	36.3825	1,00	17.6696	1997	0
Other cetacean	2	38.0556	0.521767	3	72.5055	104.276	,00	1.58057	2006	0
Other cetacean	2	37.0167	-6.61667	4	0.921891	40.6885	1,00	22.2535	1997	0
Other cetacean	1	38.06	1.02967	2	68.0885	153.749	,00	13.9003	2001	0
Other cetacean	1	38.0641	1.21293	4	60.2449	171.75	,00	22.7807	2001	0
Other cetacean	1	38.0641	1.21293	4	60.2449	171.75	,00	22.7807	2001	0
Other cetacean	2	38.0645	0.7116	3	82.6519	122.48	,00	4.42482	2004	0
Other cetacean	4	37.0415	-6.73417	2	4.65014	30.0094	1,00	11.3024	1998	0
Other cetacean	1	38.0833	8.23047	3	88.233	127.712	,00	276.211	2002	0
Other cetacean	2	38.0833	3.15	2	104.967	131.154	,00	114.51	2006	0
Other cetacean	1	38.0885	7.5812	1	102.481	120.048	,00	287.584	2005	0
Other cetacean	3	37.0566	-7.0401	2	14.2573	21.3388	1,00	11.273	1995	0
Other cetacean	2	38.1	0.483333	3	66.647	99.4429	,00	1.64651	2006	0
Other cetacean	3	38.1028	0.21055	3	52.2364	73.1172	,00	5.48563	2001	0
Other cetacean	1	37.0667	-6.93333	4	10.4751	18.4089	1,00	4.4869	1998	0
Other cetacean	1	37.0667	-6.73333	2	2.42938	28.3823	1,00	9.69839	1997	0
Other cetacean	4	37.0693	-7.09383	4	13.6959	23.093	1,00	15.9579	1998	0
Other cetacean	1	38.1167	0.85	4	74.8382	135.082	,00	13.2018	2009	0
Other cetacean	2	38.125	0.668333	3	75.2141	117.036	,00	9.07351	2003	0
Other cetacean	1	38.1253	0.9175	1	69.5451	141.619	,00	15.8679	2000	0
Other cetacean	1	38.1273	1.0345	4	62.158	153.175	,00	20.0869	2000	0
Other cetacean	2	38.1333	0.416667	2	60.053	92.1954	,00	3.04543	2003	0
Other cetacean	2	38.1333	0.516667	2	66.1706	101.98	,00	5.75939	2006	0
Other cetacean	2	37.1	-6.76667	3	0.985567	23.6878	1,00	5.09509	1997	0
Other cetacean	1	38.1415	1.1345	4	55.8828	162.917	,00	25.9888	2000	0
Other cetacean	2	38.1489	1.809	4	55.316	164.844	,00	57.9917	2010	0
Other cetacean	1	38.15	8	2	90.9406	127.475	,00	272.167	2002	0
Other cetacean	2	38.1547	3.02067	2	96.3174	138.018	,00	114.815	2004	0
Other cetacean	1	38.155	0.878667	2	70.1092	137.363	,00	17.6693	2000	0
Other cetacean	4	37.115	-7.0115	3	7.77306	14.8348	1,00	13.4191	1998	0
Other cetacean	1	38.1617	0.26	1	50.2437	76.2891	,00	1.52376	1996	0
Other cetacean	1	37.1242	-6.95635	4	4.91731	12.5993	1,00	10.1947	1998	0
Other cetacean	4	37.125	-6.85	3	2.00855	16.0078	1,00	2.77877	1996	0
Other cetacean	1	38.1697	3.21367	4	97.9246	140.329	,00	125.113	2003	0
Other cetacean	1	37.1292	-6.83717	4	0.946164	16.5275	1,00	2.17785	1998	0
Other cetacean	1	38.1717	0.926	4	65.5801	141.858	,00	20.558	2000	0
Other cetacean	1	37.1332	-6.83583	2	0.544711	16.3353	1,00	2.36391	1997	0
Other cetacean	1	38.1825	0.816333	2	72.9555	130.839	,00	18.6244	2000	0
Other cetacean	1	38.1825	1.23283	1	48.3458	172.278	,00	34.1892	2003	0
Other cetacean	1	38.1853	1.36367	4	45.4535	185.292	,00	40.5206	2000	0
Other cetacean	4	37.1482	-7.28783	4	5.42005	35.2848	1,00	35.2014	1998	0
Other cetacean	2	38.1899	0.9883	4	60.0153	147.861	,00	24.0053	2004	0
Other cetacean	2	37.1497	-7.25583	4	5.33509	32.1871	1,00	33.0588	1996	0
Other cetacean	1	38.1937	1.99097	2	61.5422	152.292	,00	70.4175	2009	0
Other cetacean	1	37.1561	-7.12165	2	4.96948	19.5679	1,00	24.0813	1998	0
Other cetacean	2	38.1978	1.8281	1	51.7841	159.669	,00	63.2062	2001	0
Other cetacean	2	38.1978	1.8281	1	51.7841	159.669	,00	63.2062	2001	0
Other cetacean	2	37.1583	-7.23333	1	4.51431	29.7793	1,00	32.0938	1997	0
Balaenopteridae	2	38.2069	0.640333	4	66.9814	113.075	,00	16.1994	2001	1
Other cetacean	1	38.2088	0.960667	2	60.4987	144.936	,00	25.076	2003	0
Other cetacean	2	38.2152	0.49665	2	58.4909	98.7084	,00	13.0907	2001	0
Other cetacean	3	37.1743	-1.8035	2	2.14897	73.0904	1,00	56.1308	1999	0
Other cetacean	1	37.1751	-6.92107	4	0.772135	8.0263	1,00	11.3399	1998	0
Other cetacean	3	38.2217	0.325633	3	47.706	81.6633	,00	9.07983	2001	0
Other cetacean	2	38.2223	1.09667	2	50.8065	158.389	,00	31.3878	2009	0
Other cetacean	2	38.2281	0.39475	3	51.0907	88.4365	,00	11.5732	2001	0
Other cetacean	2	38.2287	0.967017	4	58.6414	145.412	,00	27.1588	2004	0
Balaenopteridae	2	38.2298	0.62	4	63.9252	110.818	,00	17.8516	2001	1
Other cetacean	2	38.2299	0.67995	4	67.7634	116.787	,00	19.4867	2001	0
Other cetacean	2	38.2325	1.906	4	53.1279	152.761	,00	69.9006	2002	0
Other cetacean	1	38.2333	2.93333	2	88.3199	136.311	,00	117.722	2004	0
Other cetacean	1	38.2401	1.10515	2	48.8616	159.122	,00	33.3552	2001	0
Other cetacean	2	38.2408	1.35538	2	40.0031	184.104	,00	45.0454	2000	0
Other cetacean	2	38.2408	1.35538	2	40.0031	184.104	,00	45.0454	2000	0
Other cetacean	2	38.2408	1.35538	2	40.0031	184.104	,00	45.0454	2000	0
Other cetacean	2	38.2416	0.6734	4	66.4532	116.036	,00	20.4382	2001	0
Other cetacean	1	38.2433	1.17233	4	45.0936	165.811	,00	36.7639	2009	0
Other cetacean	2	38.251	1.24267	3	41.5461	172.796	,00	40.7115	2001	0
Other cetacean	2	38.251	1.24267	3	41.5461	172.796	,00	40.7115	2001	0
Other cetacean	1	38.2545	1.7515	3	43.3346	159.031	,00	64.6696	2007	0
Other cetacean	1	37.2143	-6.9514	2	0	3.57274	1,00	16.258	1997	0
Other cetacean	4	37.2143	-6.9514	1	0	3.57274	1,00	16.258	1997	0
Other cetacean	2	38.2561	0.657883	4	64.3397	114.383	,00	21.4095	2001	0
Other cetacean	2	38.2584	1.92457	4	52.2974	149.59	,00	73.0612	2002	0
Other cetacean	2	38.2624	1.34392	2	37.9936	182.862	,00	46.4295	2001	0
Other cetacean	1	38.2667	0.983333	2	54.8283	146.818	,00	31.2574	2003	0
Other cetacean	1	38.2667	1.0167	4	52.4438	150.151	,00	32.1724	1996	0
Other cetacean	2	38.2707	1.45273	4	37.2163	176.438	,00	52.2173	2001	0
Other cetacean	2	38.2709	1.19658	2	41.5323	168.108	,00	40.3318	2000	0
Other cetacean	1	38.2765	1.8395	4	45.653	152.363	,00	70.7074	2007	0
Other cetacean	2	38.28	0.764967	2	70.3557	124.944	,00	26.6176	2001	0
Other cetacean	2	38.2872	1.57142	4	36.1907	167.343	,00	59.1956	2001	0
Other cetacean	1	38.293	0.915583	2	58.3341	139.95	,00	31.9516	2001	0
Other cetacean	2	38.2979	0.609017	4	57.974	109.293	,00	24.1015	2001	0
Other cetacean	1	38.2992	3.95467	2	128.496	176.819	,00	172.141	2003	0
Other cetacean	1	38.304	0.316167	3	40.3035	80.0038	,00	12.939	2007	0
Other cetacean	1	38.3083	1.343	4	33.4694	181.429	,00	50.451	2003	0
Other cetacean	2	38.3089	0.793783	4	67.6833	127.735	,00	30.1796	2008	0
Other cetacean	1	38.3107	1.01633	2	49.4196	149.984	,00	36.3879	2000	0
Other cetacean	1	38.3117	0.94	2	55.2599	142.35	,00	34.4125	2000	0
Other cetacean	1	38.3137	0.585167	3	55.2203	106.868	,00	24.975	2000	0
Other cetacean	2	38.3167	3.01667	4	80.1252	130.267	,00	128.973	2006	0
Other cetacean	2	38.3205	1.69547	4	35.1615	156.976	,00	67.9064	2001	0
Other cetacean	2	38.3209	1.95763	4	50.1876	142.522	,00	80.1305	2001	0
Other cetacean	2	38.3247	1.83508	4	41.4974	148.548	,00	74.767	2001	0
Other cetacean	1	38.3251	0.648067	4	58.6844	113.143	,00	27.7793	2014	0
Other cetacean	2	38.3267	1.7586	2	37.1399	152.715	,00	71.3895	2001	0
Other cetacean	2	38.3268	2.251	4	74.485	130.245	,00	94.2887	2000	0
Other cetacean	1	38.327	3.74633	3	111.245	165.491	,00	163.8	2003	0
Other cetacean	2	38.3284	1.8641	2	43.0537	146.665	,00	76.4417	2008	0
Other cetacean	2	38.3324	1.72525	2	35.1469	154.228	,00	70.3457	2001	0
Other cetacean	1	38.3333	1.1	2	41.8776	158.333	,00	41.4087	2003	0
Balaenopteridae	2	38.3395	2.677	3	81.9014	122.746	,00	115.209	2004	1
Other cetacean	1	38.343	2.00717	1	52.671	138.224	,00	84.388	2001	0
Other cetacean	1	38.3464	1.0162	2	47.1085	149.959	,00	39.8235	2009	0
Other cetacean	1	38.349	2.05733	3	56.4779	135.424	,00	87.2507	2001	0
Other cetacean	2	38.35	1.5	1	30.0317	167.415	,00	61.437	2006	0
Other cetacean	2	38.3522	1.23517	1	32.539	171.86	,00	49.3206	2003	0
Other cetacean	1	38.3667	1.15	2	36.0705	163.367	,00	46.6464	2003	0
Other cetacean	2	38.3667	2.14425	4	63.1525	130.221	,00	92.856	2002	0
Other cetacean	2	38.3671	0.699017	2	59.7042	118.283	,00	33.2092	2001	0
Other cetacean	2	38.372	1.95973	2	47.1296	137.972	,00	84.7542	2001	0
Other cetacean	2	38.3734	1.32938	2	27.3724	177.987	,00	55.578	2001	0
Other cetacean	2	38.3867	1.2885	4	27.23	177.264	,00	54.8541	2001	0
Other cetacean	1	38.3907	1.57021	2	25.8426	159.649	,00	68.3064	2009	0
Other cetacean	1	38.3932	0.9986	2	45.7883	148.314	,00	43.8502	2009	0
Other cetacean	2	38.3938	2.6755	2	76.8039	117.311	,00	119.95	2004	0
Other cetacean	2	38.4	0.6333	2	52.5491	111.862	,00	29.6566	1995	0
Other cetacean	2	38.411	0.962833	4	47.9466	144.825	,00	44.5927	2004	0
Other cetacean	2	38.4175	3.41917	1	83.4775	138.282	,00	156.608	2000	0
Other cetacean	1	38.425	0.811167	2	61.1598	129.774	,00	40.9946	2000	0
Other cetacean	1	38.4432	0.622	4	48.9462	111.078	,00	25.8922	2003	0
Other cetacean	1	38.45	0.616667	2	48.1069	110.617	,00	25.0364	2003	0
Other cetacean	2	38.4529	0.984967	2	44.0636	147.316	,00	49.2293	2000	0
Other cetacean	2	38.4547	2.817	2	67.3209	112.447	,00	131.913	2004	0
Other cetacean	1	38.455	0.9683	1	45.4892	145.672	,00	48.9759	1996	0
Other cetacean	1	38.4592	0.810333	3	58.8633	129.977	,00	38.6096	2000	0
Other cetacean	2	38.4666	0.65	2	49.8584	114.114	,00	26.3508	1995	0
Other cetacean	4	38.4793	1.11483	4	31.3626	160.482	,00	55.4636	2009	0
Other cetacean	1	38.4833	0.466667	2	34.6722	96.1769	,00	11.7735	2003	0
Other cetacean	1	38.485	1.1067	3	31.7777	159.725	,00	55.7213	1996	0
Other cetacean	1	38.4903	2.22117	2	66.0147	115.862	,00	107.379	2002	0
Other cetacean	1	38.4917	0.6633	4	49.6594	115.752	,00	25.6185	1997	0
Other cetacean	2	38.496	1.158	2	26.821	164.937	,00	58.6197	2007	0
Other cetacean	1	38.5	1.083	2	33.1891	157.518	,00	55.82	1995	0
Other cetacean	1	38.5	1.13333	2	28.7211	162.524	,00	58.0493	2009	0
Other cetacean	2	38.5012	2.5375	2	73.1736	107.142	,00	123.04	2003	0
Other cetacean	1	38.5033	1.31667	4	15.3749	170.542	,00	66.4933	2009	0
Other cetacean	2	38.5075	2.37867	4	81.0455	109.337	,00	116.219	2000	0
Other cetacean	2	38.5126	0.534933	4	37.8107	103.393	,00	14.786	2002	0
Other cetacean	1	38.5167	2.25	4	68.238	112.361	,00	111.051	2002	0
Other cetacean	1	38.5285	2.22217	4	65.2771	112.287	,00	110.805	2001	0
Balaenopteridae	4	38.5308	0.9445	2	44.5756	144.142	,00	43.5723	1997	1
Other cetacean	1	38.5467	3.56365	4	82.8233	136.934	,00	174.763	2002	0
Other cetacean	1	38.55	0.633	2	44.2409	113.717	,00	19.432	1995	0
Other cetacean	1	38.55	3.65	4	89.0461	142.605	,00	179.068	2002	0
Other cetacean	1	38.5505	1.04129	2	35.3723	154.001	,00	49.3304	2009	0
Other cetacean	2	38.5565	0.662917	1	46.6916	116.777	,00	21.184	2004	0
Other cetacean	2	38.5608	3.773	3	97.116	150.759	,00	185.744	2000	0
Other cetacean	2	38.5608	3.773	3	97.116	150.759	,00	185.744	2000	0
Other cetacean	2	38.5635	1.90842	4	33.9068	124.751	,00	99.3225	2004	0
Other cetacean	2	38.5695	2.8465	2	55.5124	101.634	,00	143.452	2004	0
Other cetacean	2	38.5798	2.474	2	70.6074	100.241	,00	127.054	2000	0
Other cetacean	1	38.58	3.22067	4	59.514	113.981	,00	161.771	2002	0
Other cetacean	2	38.5833	2.58033	2	63.9477	98.5798	,00	132.306	2004	0
Other cetacean	3	37.55	-0.8333	4	2.65852	15.8146	1,00	20.0369	1995	0
Other cetacean	1	38.5952	2.05367	3	47.5811	113.992	,00	108.877	2002	0
Other cetacean	1	38.5995	2.4835	2	68.4954	98.1394	,00	129.237	2002	0
Other cetacean	1	38.6078	2.64317	2	58.5851	95.8858	,00	137.396	2005	0
Other cetacean	1	38.6245	2.12467	3	54.4026	107.873	,00	114.774	2002	0
Other cetacean	3	37.5862	-0.576667	1	13.2489	40.6901	1,00	3.68557	2002	0
Other cetacean	2	37.596	-0.680667	4	3.40765	30.2693	1,00	11.977	1999	0
Other cetacean	2	38.6448	2.92303	3	47.2844	96.1466	,00	153.674	2002	0
Other cetacean	2	37.6118	-0.687167	2	1.97309	29.6401	1,00	13.527	2000	0
Other cetacean	2	37.6118	-0.687167	2	1.97309	29.6401	1,00	13.527	2000	0
Other cetacean	2	38.661	0.846933	2	43.2307	137.003	,00	27.5632	2001	0
Other cetacean	2	38.6767	2.92717	4	44.0755	93.216	,00	156.689	2004	0
Balaenopteridae	2	38.6802	0.714883	1	48.4325	124.742	,00	16.5773	2001	1
Other cetacean	2	38.6842	3.76917	4	87.0084	142.525	,00	196.486	2000	0
Other cetacean	2	38.6953	0.634833	4	40.3026	117.53	,00	9.6811	2000	0
Other cetacean	1	38.7028	2.7425	2	45.6061	86.8772	,00	150.424	2005	0
Other cetacean	2	38.7163	2.2553	2	67.4205	93.7488	,00	127.042	2008	0
Other cetacean	2	38.7167	2.56667	2	54.2081	85.4075	,00	143.477	2006	0
Other cetacean	2	38.7278	3.32203	2	52.9421	107.489	,00	179.566	2004	0
Balaenopteridae	1	38.7333	0.8	4	44.3417	134.423	,00	19.2039	2004	1
Other cetacean	1	38.7535	2.92917	4	36.3961	85.9752	,00	163.586	2000	0
Other cetacean	1	38.7607	0.984167	2	26.3674	152.845	,00	30.845	2007	0
Other cetacean	1	38.7695	2.74083	3	39.7099	80.2325	,00	156.249	2005	0
Other cetacean	1	38.7708	2.3525	4	67.4652	84.9622	,00	130.459	2002	0
Other cetacean	2	38.7762	0.6326	4	39.8961	120.06	,00	4.01701	2009	0
Other cetacean	1	38.8	0.9	3	32.7875	143.877	,00	21.9999	2004	0
Other cetacean	1	38.8172	2.51267	4	51.5265	76.1978	,00	139.048	2002	0
Other cetacean	2	38.819	3.648	2	68.9099	124.7	,00	202.793	2004	0
Other cetacean	2	38.8336	2.00317	4	42.7469	97.7615	,00	100.579	2001	0
Other cetacean	3	38.8345	2.76183	3	33.0219	74.0658	,00	156.134	2004	0
Other cetacean	2	38.8346	0.980517	2	24.1341	149.563	,00	25.5476	2000	0
Other cetacean	2	38.846	0.5765	4	35.3596	113.604	,00	4.84302	2009	0
Other cetacean	1	38.8518	1.03383	3	18.5453	153.715	,00	28.2849	2007	0
Other cetacean	1	38.8595	2.96583	2	25.6589	77.449	,00	169.388	2000	0
Other cetacean	2	38.867	2.77967	2	29.3174	71.1581	,00	155.231	2009	0
Balaenopteridae	1	38.8833	0.966667	4	24.6307	146.299	,00	21.2187	2004	1
Other cetacean	3	38.89	2.152	4	54.6953	84.0168	,00	107.656	2002	0
Other cetacean	1	38.8905	2.85467	2	24.0089	70.6463	,00	159.13	2009	0
Other cetacean	1	38.8908	2.87533	2	23.4027	71.2408	,00	160.623	2005	0
Other cetacean	1	38.8917	2.859	2	23.7637	70.6616	,00	159.369	2009	0
Other cetacean	1	38.896	2.81283	2	25.1583	69.0151	,00	155.69	2009	0
Other cetacean	2	38.8972	1.83127	4	24.65	105.756	,00	83.6513	2001	0
Other cetacean	2	38.9003	1.77723	4	20.0962	109.807	,00	79.483	2001	0
Other cetacean	2	38.901	3.07217	4	24.1567	78.8249	,00	174.36	2000	0
Other cetacean	1	38.9027	3.04117	2	22.7554	77.0654	,00	171.974	2005	0
Other cetacean	1	38.9083	0.4795	2	28.7169	102.076	,00	16.1911	1997	0
Other cetacean	2	38.9107	3.02667	2	21.5289	75.6448	,00	170.367	2009	0
Other cetacean	1	38.9127	2.84583	2	22.2407	68.2691	,00	156.975	2009	0
Other cetacean	1	38.9137	2.89433	4	20.7747	69.7214	,00	160.462	2009	0
Other cetacean	2	38.923	2.95483	3	19.3201	71.2201	,00	164.263	2009	0
Other cetacean	1	38.9333	0.7683	4	44.4887	126.159	,00	3.27886	1996	0
Other cetacean	1	38.9347	2.87733	2	19.1158	67.1643	,00	157.788	2009	0
Other cetacean	2	38.938	2.24633	1	58.649	74.7107	,00	111.306	2003	0
Other cetacean	1	38.9417	10.45	4	88.9411	136.139	,00	277.707	1997	0
Other cetacean	2	38.948	2.9008	3	17.2812	66.757	,00	158.601	2014	0
Other cetacean	1	38.9487	2.941	4	16.8441	68.3085	,00	161.503	2009	0
Other cetacean	1	38.95	3.36667	2	42.8395	94.5457	,00	192.615	2005	0
Other cetacean	1	38.9667	4.53333	1	88.6345	197.66	,00	193.913	2005	0
Other cetacean	3	38.9833	2.96667	2	13.2806	66.3744	,00	161.026	2000	0
Other cetacean	1	38.9918	0.662	1	48.7565	114.054	,00	8.49473	2000	0
Other cetacean	1	38.9983	3.05483	2	14.9831	69.7777	,00	166.469	2009	0
Other cetacean	1	39.0158	0.4057	2	30.3306	90.1539	,00	28.9129	1997	0
Other cetacean	1	39.0182	0.691667	3	52.6058	115.712	,00	8.11116	2002	0
Other cetacean	1	39.0198	3.134	3	19.3015	73.0262	,00	170.81	2005	0
Other cetacean	2	39.0294	0.410517	2	31.713	89.9045	,00	29.4814	2009	0
Balaenopteridae	1	39.0333	0.916667	4	31.2	134.371	,00	7.35079	2004	1
Other cetacean	1	39.0388	0.4248	4	33.3144	90.7056	,00	29.0772	1996	0
Other cetacean	2	39.0625	2.2135	1	49.4164	66.6871	,00	100.431	2003	0
Other cetacean	2	39.0667	1.8333	4	21.356	95.7583	,00	72.2748	1995	0
Other cetacean	1	39.0698	0.811833	3	42.2755	124.381	,00	2.81664	2002	0
Other cetacean	2	39.077	3.114	1	14.5635	67.4588	,00	165.456	2008	0
Other cetacean	2	39.0792	3.16567	4	19.2931	70.9626	,00	169.096	2000	0
Other cetacean	2	39.0822	0.6525	3	52.7031	109.709	,00	15.3354	2001	0
Other cetacean	3	39.1	3.08333	4	10.8358	63.6832	,00	161.643	2000	0
Other cetacean	1	39.1	3.31667	4	27.5639	81.377	,00	178.748	2005	0
Other cetacean	2	39.1052	3.09848	2	12.103	64.3461	,00	162.397	2014	0
Other cetacean	1	39.1313	3.13183	2	14.9458	64.9368	,00	163.067	2009	0
Other cetacean	2	39.1392	3.11633	1	13.3175	63.2632	,00	161.398	2014	0
Other cetacean	2	39.1398	0.9814	4	30.1143	132.191	,00	4.85215	2004	0
Other cetacean	2	39.1424	0.404633	2	39.9758	84.4373	,00	37.6033	2001	0
Other cetacean	2	39.1485	0.8438	3	42.2075	121.172	,00	5.82407	2006	0
Other cetacean	1	39.152	0.215	4	31.9476	66.8667	,00	52.1561	1997	0
Other cetacean	1	39.1578	0.2023	2	32.1127	65.4732	,00	53.4816	1997	0
Other cetacean	2	39.1624	3.20717	1	17.0669	68.836	,00	166.474	2014	0
Other cetacean	1	39.1626	3.2475	2	18.9177	72.1274	,00	169.416	2000	0
Other cetacean	2	39.1687	3.40933	4	26.7433	85.7316	,00	180.87	2000	0
Other cetacean	2	39.1771	0.883933	3	40.2046	122.294	,00	4.82968	2006	0
Balaenopteridae	4	39.1775	0.6573	4	59.1972	105.974	,00	21.4679	1997	1
Other cetacean	3	39.1833	1.2417	1	15.3291	145.955	,00	20.9769	1995	0
Other cetacean	1	39.1833	3.31667	3	20.0791	76.9018	,00	173.079	2005	0
Other cetacean	3	39.193	0.235883	3	36.5113	66.9375	,00	53.4151	2004	0
Other cetacean	3	39.1958	0.490667	1	49.6285	90.7044	,00	34.9299	2002	0
Other cetacean	3	39.2	1.21667	4	17.949	147.949	,00	18.0059	1999	0
Other cetacean	1	39.2003	1.66426	3	12.1851	105.161	,00	50.7939	2009	0
Other cetacean	4	39.2388	2.1876	3	34.9548	56.6842	,00	86.5412	2009	0
Other cetacean	4	39.2388	2.1876	3	34.9547	56.6842	,00	86.5408	2009	0
Other cetacean	2	39.2393	4.10867	3	59.3754	149.494	,00	174.573	2002	0
Other cetacean	2	39.2665	3.89267	4	58.5465	127.841	,00	175.713	2009	0
Balaenopteridae	4	38.2328	-0.05	2	30.5205	44.4842	1,00	0	1997	1
Other cetacean	2	39.305	2.17783	2	30.3324	53.9825	,00	81.322	2001	0
Other cetacean	2	39.3167	0.15	3	38.958	54.5999	,00	68.1235	1995	0
Other cetacean	2	38.2833	-0.25	2	18.1458	23.863	1,00	0.61063	2000	0
Balaenopteridae	1	39.33	2.03	4	39.7905	66.3635	,00	68.7847	1996	1
Other cetacean	1	39.3307	3.4678	2	20.5761	85.1162	,00	174.135	1995	0
Other cetacean	1	39.3312	0.499833	1	60.8095	84.0343	,00	43.463	2007	0
Other cetacean	2	39.3364	0.433633	1	57.764	79.4415	,00	48.674	2000	0
Other cetacean	1	38.3017	0.183833	2	34.5101	66.7915	1,00	3.39363	2000	0
Other cetacean	1	39.3469	3.4398	2	17.352	81.9806	,00	170.98	1996	0
Other cetacean	1	39.359	0.94	2	48.0187	116.162	,00	13.0899	2005	0
Other cetacean	3	39.3657	0.522	4	64.9081	82.969	,00	44.1847	2002	0
Other cetacean	2	39.3667	0.766667	4	61.1814	101.338	,00	26.3175	2003	0
Other cetacean	2	39.3753	4.06283	4	47.8172	142.573	,00	161.996	2009	0
Balaenopteridae	1	39.383	1.933	3	43.8226	74.015	,00	58.0692	1995	1
Balaenopteridae	1	39.3833	1.9333	1	43.865	73.9785	,00	58.0708	1996	1
Other cetacean	1	39.3928	0.903333	2	53.0078	111.271	,00	18.079	2005	0
Other cetacean	2	39.4008	3.97917	4	48.4778	133.947	,00	160.963	2009	0
Other cetacean	2	39.4308	3.7383	2	36.5011	109.675	,00	162.27	2004	0
Other cetacean	2	39.4317	0.757833	2	66.3503	96.8927	,00	31.3862	2000	0
Other cetacean	2	39.4333	0.65	4	74.348	88.0045	,00	39.402	1995	0
Other cetacean	1	39.4382	1.16767	4	40.7132	132.741	,00	1.78561	2002	0
Other cetacean	2	39.45	0.816667	4	63.2758	100.899	,00	28.3204	2003	0
Other cetacean	1	39.451	3.84583	3	44.4061	120.141	,00	158.38	2001	0
Other cetacean	1	39.4757	1.7328	4	39.9446	92.17	,00	37.0884	1996	0
Other cetacean	2	39.4833	0.35	4	56.4392	62.741	,00	64.7943	1995	0
Other cetacean	3	39.5	5.73333	2	144.372	268.354	,00	140.323	2006	0
Other cetacean	1	39.5078	3.82517	4	40.0262	117.664	,00	153.157	2000	0
Other cetacean	1	39.513	3.90635	3	41.4182	125.75	,00	151.208	2008	0
Other cetacean	1	39.518	1.27075	3	44.8735	138.011	,00	0.338523	2008	0
Other cetacean	2	39.5346	0.5302	4	66.488	72.3374	,00	55.0775	2003	0
Other cetacean	3	38.4968	0.157667	4	15.4744	66.1523	1,00	11.7959	2002	0
Other cetacean	3	39.5392	0.25335	2	45.8832	52.4192	,00	75.6791	1999	0
Other cetacean	1	38.5	1.43333	4	14.3334	161.804	1,00	71.6202	2003	0
Other cetacean	2	39.575	0.618	3	69.1391	77.4356	,00	51.3859	2000	0
Other cetacean	4	39.5751	4.03308	3	30.4375	138.311	,00	142.855	2000	0
Other cetacean	1	39.5755	3.86862	3	35.0007	121.865	,00	145.721	2001	0
Other cetacean	1	39.5856	3.9143	1	34.2854	126.444	,00	143.919	2013	0
Other cetacean	4	38.5483	1.195	4	21.0039	169.204	1,00	60.7448	1996	0
Other cetacean	2	39.5909	0.5726	4	64.9069	72.7191	,00	55.7976	2003	0
Other cetacean	3	38.5704	0.281017	3	17.2633	80.026	1,00	7.75536	2004	0
Other cetacean	2	39.6153	0.611967	4	65.8323	74.9454	,00	54.567	2003	0
Other cetacean	3	39.6167	0.516667	2	59.3349	66.6041	,00	61.6481	1999	0
Other cetacean	2	39.6168	0.534833	2	60.4849	68.1513	,00	60.3232	2001	0
Other cetacean	2	39.6244	0.55285	2	61.0904	69.3218	,00	59.524	2001	0
Other cetacean	1	39.6383	0.835	4	75.7787	94.3954	,00	39.7843	1996	0
Other cetacean	1	39.6408	1.33717	2	55.0866	131.493	,00	3.14541	2005	0
Other cetacean	1	39.6583	0.8233	4	78.0742	92.6144	,00	42.0023	1996	0
Other cetacean	2	39.6598	1.066	2	65.0786	115.741	,00	24.3155	2000	0
Other cetacean	1	39.6618	4.03233	4	22.7434	138.561	,00	134.335	2000	0
Other cetacean	3	39.673	1.40317	3	56.6867	125.136	,00	0.495208	1999	0
Other cetacean	1	39.6833	1.3	4	60.0748	135.503	,00	8.76066	2003	0
Other cetacean	2	39.6899	0.717183	2	68.9216	81.5591	,00	51.9282	2001	0
Balaenopteridae	1	39.7017	3.81833	4	22.9588	117.611	,00	134.192	2000	1
Other cetacean	3	38.6783	1.0745	3	24.9304	159.558	1,00	43.067	1999	0
Other cetacean	2	39.7292	1.299	3	64.5453	136.074	,00	11.9514	2000	0
Other cetacean	4	39.7337	2.09112	4	29.3089	58.3317	,00	45.8034	2009	0
Other cetacean	1	39.7567	3.83833	4	17.1675	120.343	,00	128.426	2000	0
Other cetacean	1	39.7667	2.03333	3	35.9383	64.8288	,00	39.328	2000	0
Other cetacean	2	39.7733	1.7383	1	63.8337	93.4823	,00	17.2495	1997	0
Other cetacean	3	39.8	1.28333	2	71.7985	131.709	,00	17.9178	2007	0
Other cetacean	1	38.759	1.01933	2	23.4152	156.179	1,00	33.5363	2007	0
Other cetacean	1	38.7597	1.00433	3	24.6585	154.755	1,00	32.3914	2007	0
Other cetacean	2	39.806	0.864083	2	70.2125	92.809	,00	49.0612	2001	0
Other cetacean	2	39.806	0.864083	2	70.2125	92.809	,00	49.0612	2001	0
Other cetacean	2	39.806	0.864083	2	70.2125	92.809	,00	49.0612	2001	0
Other cetacean	2	39.806	0.864083	2	70.2125	92.809	,00	49.0612	2001	0
Other cetacean	1	39.8083	2.00883	1	40.0355	68.5199	,00	34.6979	2005	0
Other cetacean	2	39.8094	0.864083	2	69.9856	92.7519	,00	49.2879	2001	0
Other cetacean	1	39.8188	1.95933	1	44.8894	73.5261	,00	30.3552	2005	0
Other cetacean	2	38.79	1.34067	4	5.14495	152.236	1,00	54.983	2000	0
Other cetacean	1	39.8373	1.959	4	45.8007	74.212	,00	29.0724	2005	0
Other cetacean	2	39.85	0.9	2	70.07	95.7137	,00	49.4188	1995	0
Other cetacean	2	39.8549	0.9236	2	71.6412	97.9996	,00	48.021	2001	0
Other cetacean	2	39.866	0.9084	2	69.7562	96.3669	,00	49.8936	2001	0
Other cetacean	1	39.8808	2.29652	4	26.8622	47.2884	,00	50.8586	2007	0
Balaenopteridae	1	38.8427	1.35433	3	0.991033	148.423	1,00	52.4025	2000	1
Other cetacean	2	38.8498	1.24268	4	1.52067	157.938	1,00	43.7329	2004	0
Other cetacean	1	38.8567	1.10333	4	11.6819	159.924	1,00	33.0508	2009	0
Other cetacean	1	39.9018	2.18667	1	33.6623	57.1852	,00	41.3743	2007	0
Other cetacean	2	39.9073	1.23383	3	83.4221	120.944	,00	28.847	2000	0
Other cetacean	4	38.8767	0.2517	1	9.87948	86.0705	1,00	30.7405	1995	0
Other cetacean	4	38.8816	0.3783	1	18.7309	95.3815	1,00	21.7934	1995	0
Other cetacean	1	38.8863	0.4208	4	22.53	98.4948	1,00	18.9977	2001	0
Other cetacean	1	38.8908	1.15683	4	5.6706	161.674	1,00	34.6487	2007	0
Other cetacean	1	38.8973	1.14983	4	6.26133	160.719	1,00	33.6934	2007	0
Other cetacean	3	39.9553	1.86783	3	59.8251	87.3411	,00	14.3633	1999	0
Balaenopteridae	1	39.9633	2.7933	1	9.2881	42.1726	,00	81.6625	1996	1
Other cetacean	3	39.9647	1.84117	3	62.549	90.1452	,00	11.7737	1999	0
Other cetacean	1	39.9725	1.87133	2	60.5453	87.8079	,00	13.4523	2005	0
Other cetacean	1	39.9873	2.32017	1	34.8504	53.4556	,00	45.3449	2005	0
Other cetacean	1	39.9873	2.32017	1	34.8504	53.4556	,00	45.3449	2005	0
Other cetacean	1	39.9982	2.77517	4	13.1227	44.9287	,00	77.9617	2009	0
Other cetacean	4	40.0004	2.72211	3	15.6557	43.968	,00	73.9211	2009	0
Other cetacean	1	40.002	2.00783	2	52.4005	77.5818	,00	21.4518	2005	0
Other cetacean	3	40.0167	1.45	2	89.2132	111.803	,00	20.4376	2007	0
Other cetacean	3	40.017	1.982	3	55.2496	80.562	,00	18.5379	1999	0
Other cetacean	1	38.9917	1.6917	2	7.82187	111.755	1,00	66.9962	1995	0
Other cetacean	2	38.9947	2.89487	2	12.8585	62.2147	1,00	154.988	2004	0
Other cetacean	2	40.0417	1.37217	3	82.2183	108.192	,00	27.8436	2000	0
Other cetacean	2	40.0933	1.2667	2	71.6825	102.35	,00	39.0867	1997	0
Other cetacean	3	39.0667	1.2917	4	2.65245	144.739	1,00	32.573	1993	0
Other cetacean	1	40.1085	2.4095	4	40.4619	59.281	,00	43.652	2005	0
Other cetacean	1	40.1262	2.34167	2	45.9004	63.8835	,00	37.4778	2005	0
Balaenopteridae	2	40.1333	1.48333	4	83.4668	101.064	,00	25.9295	2003	1
Other cetacean	1	39.1	1.3667	3	2.26733	136.552	1,00	35.8058	1996	0
Other cetacean	3	39.1293	1.57183	4	2.4075	116.349	1,00	48.8479	2001	0
Other cetacean	2	40.1833	2.93333	4	26.4168	67.8642	,00	76.9614	2002	0
Other cetacean	2	40.1908	2.633	4	36.5733	62.4398	,00	54.4355	2002	0
Other cetacean	1	39.151	0.0169	4	22.7761	50.3221	1,00	66.6098	1997	0
Other cetacean	1	40.2183	2.55083	4	43.0535	65.9169	,00	46.5418	2007	0
Other cetacean	4	40.2189	4.18887	3	15.5414	167.139	,00	76.7367	2009	0
Other cetacean	2	40.2558	1.73533	1	89.5535	98.8222	,00	15.7889	2002	0
Other cetacean	3	40.2775	1.30007	2	60.1918	84.0609	,00	49.1731	2004	0
Other cetacean	3	40.3001	1.41357	2	67.6543	83.282	,00	42.3845	2004	0
Other cetacean	3	39.2746	-0.09235	2	15.4112	34.1713	1,00	83.0276	2004	0
Other cetacean	1	39.2767	2.9982	2	3.79628	45.3127	1,00	143.384	1996	0
Other cetacean	2	39.3102	2.19462	1	28.8354	52.2661	1,00	82.2021	2001	0
Other cetacean	4	39.3147	2.17083	2	30.1119	54.1391	1,00	80.1514	2000	0
Other cetacean	4	39.3322	2.4819	4	13.8462	28.85	1,00	101.761	1996	0
Other cetacean	3	39.3479	2.30165	3	19.7607	41.133	1,00	87.4782	2001	0
Other cetacean	1	39.3867	2.7538	2	1.52105	20.7756	1,00	117.986	1995	0
Other cetacean	2	40.4459	2.32232	3	73.7816	93.8327	,00	14.3107	2014	0
Other cetacean	3	39.407	2.45435	4	7.39539	25.2532	1,00	94.6542	2007	0
Other cetacean	3	39.4085	2.28	2	15.8118	40.2389	1,00	81.7715	2010	0
Other cetacean	2	39.5	2.6167	4	4.77886	7.45207	1,00	100.23	1995	0
Other cetacean	1	39.5402	2.36742	2	0.865747	28.382	1,00	79.2216	2007	0
Other cetacean	2	40.5817	2.3911	2	76.6758	82.9428	,00	10.1194	2014	0
Balaenopteridae	2	40.6	5.6	3	145.882	254.691	,00	30.9561	2006	1
Other cetacean	3	39.57	2.1	3	25.0843	55.001	1,00	57.5918	1995	0
Other cetacean	1	39.6283	2.38	2	0.502366	27.6945	1,00	74.1517	1996	0
Other cetacean	2	40.6837	2.50708	3	72.5332	77.4431	,00	11.6803	2014	0
Other cetacean	2	39.6655	0.039	4	21.4894	31.4042	1,00	99.9849	2002	0
Other cetacean	2	40.7291	2.45277	2	65.8787	71.0803	,00	4.61545	2014	0
Other cetacean	1	39.7063	0.678667	1	65.1194	77.3776	1,00	55.8717	2007	0
Balaenopteridae	2	40.75	5.81667	2	172.023	237.786	,00	22.5755	2006	1
Other cetacean	2	39.7176	0.719283	2	66.9978	80.8603	1,00	53.6595	2001	0
Balaenopteridae	2	40.7721	2.44852	4	61.9402	66.964	,00	1.37547	2014	1
Balaenopteridae	2	39.75	3.21667	4	0	59.5586	1,00	127.205	2000	1
Other cetacean	2	39.7567	0.5367	2	50.7508	62.314	1,00	69.7044	1995	0
Other cetacean	1	40.8667	1.35305	1	25.786	27.0344	,00	73.1414	2009	0
Other cetacean	2	39.83	0.032	4	9.40049	15.9379	1,00	111.687	2000	0
Other cetacean	4	39.85	2.5883	1	9.07392	28.9974	1,00	74.3415	1996	0
Other cetacean	1	40.9347	1.333	1	18.7081	20.0032	,00	76.3913	2010	0
Other cetacean	3	39.9333	2.95	4	1.50032	47.3756	1,00	95.1876	2000	0
Other cetacean	1	40.9815	1.36442	2	15.0529	17.7129	,00	74.1881	2010	0
Other cetacean	2	39.9702	0.436133	2	29.4591	48.6146	1,00	91.597	2001	0
Other cetacean	2	41.0305	2.21167	3	28.3375	34.6282	,00	8.09142	2014	0
Other cetacean	1	41.0408	2.22519	1	27.9106	34.1355	,00	9.22646	2009	0
Other cetacean	2	41.0433	3.0595	1	66.458	94.7597	,00	15.5315	2009	0
Other cetacean	1	41.0686	2.26395	1	27.032	32.711	,00	12.5098	2009	0
Other cetacean	2	41.0994	2.64405	2	47.1451	54.8285	,00	6.55438	2014	0
Other cetacean	4	40.1389	4.2478	3	10.6885	169.717	1,00	83.5748	2009	0
Other cetacean	1	40.7155	1.35747	4	38.8195	41.5328	1,00	69.8558	2009	0
Balaenopteridae	2	41.8667	3.6167	4	39.261	109.911	,00	18.1937	1995	1
Balaenopteridae	1	40.8803	1.31088	2	22.2268	24.4033	1,00	77.5391	2010	1
Balaenopteridae	1	40.8814	1.29	2	21.0099	23.8643	1,00	79.6098	2010	1
Other cetacean	2	41.9399	3.4177	1	18.3807	91.9655	,00	0.724553	1995	0
Other cetacean	2	41.9399	3.4177	1	18.3807	91.9655	,00	0.724553	1995	0
Other cetacean	2	41.9399	3.4177	1	18.3807	91.9655	,00	0.724553	1995	0
Other cetacean	2	41.9408	3.9365	4	70.1248	128.48	,00	20.6146	1995	0
Balaenopteridae	1	40.9094	1.28848	2	18.562	21.0793	1,00	80.287	2010	1
Other cetacean	2	41.9517	3.9234	4	68.7851	126.779	,00	21.9545	1995	0
Other cetacean	2	41.9581	3.8828	2	64.7155	123.139	,00	23.4297	1995	0
Balaenopteridae	1	40.9301	1.30783	2	18.1617	19.5341	1,00	78.7764	2010	1
Balaenopteridae	2	41.976	3.5483	4	31.2788	97.1838	,00	12.6723	1996	1
Other cetacean	2	41.9784	3.6033	2	36.7838	100.764	,00	18.1617	1996	0
Balaenopteridae	1	40.9479	1.33223	2	17.4083	18.775	1,00	76.7158	2010	1
Balaenopteridae	1	40.9931	1.33743	2	13.1995	15.1399	1,00	77.0571	2010	1
Balaenopteridae	2	42.05	3.9	3	64.3095	119.269	,00	32.0566	1996	1
Balaenopteridae	2	42.0527	3.6112	4	38.5499	96.1667	,00	19.8304	1996	1
Balaenopteridae	1	41.0256	1.29455	2	9.0487	10.135	1,00	81.8825	2010	1
Balaenopteridae	2	42.0833	3.9333	3	66.0597	120.334	,00	34.6162	1996	1
Other cetacean	2	42.0833	3.9333	3	66.0597	120.334	,00	34.6162	1996	0
Balaenopteridae	1	41.0434	1.44857	2	11.3868	21.1652	1,00	67.0921	2010	1
Other cetacean	1	41.0437	1.44448	2	11.245	20.7715	1,00	67.4991	2010	0
Balaenopteridae	1	41.0474	1.4556	2	11.1905	21.6944	1,00	66.4774	2010	1
Other cetacean	1	41.0517	1.58195	2	13.7902	33.8248	1,00	54.1495	2010	0
Balaenopteridae	2	42.1675	4.1508	4	84.7466	135.943	,00	38.2998	1996	1
Balaenopteridae	2	42.2167	3.7167	2	41.2895	94.8988	,00	32.2572	1996	1
Other cetacean	2	42.2333	3.75	2	44.1486	96.9695	,00	35.7611	1996	0
Balaenopteridae	2	42.2333	3.7667	2	45.7851	98.4367	,00	37.4192	1996	1
Balaenopteridae	2	42.25	6.2214	4	73.7371	92.1199	,00	28.178	1996	1
Balaenopteridae	2	42.2689	4.244	2	92.7859	141.145	,00	46.2656	1995	1
Balaenopteridae	2	42.3633	3.7683	4	45.2381	93.1296	,00	39.1252	1995	1
Other cetacean	2	42.3833	3.8	4	48.6038	95.4096	,00	42.5107	1995	0
Other cetacean	2	42.4	3.9333	4	62.038	107.597	,00	55.9447	1995	0
Other cetacean	2	42.4142	4.075	1	76.2755	120.926	,00	64.0096	1995	0
Balaenopteridae	2	42.4167	4.0333	1	72.1692	116.817	,00	65.1265	1995	1
Other cetacean	2	42.4167	4.0667	4	75.4821	120.06	,00	64.4277	1995	0
Other cetacean	2	42.4181	4.0801	1	76.8292	121.33	,00	64.2843	1995	0
Other cetacean	1	41.3971	2.38453	1	9.1722	20.9978	1,00	0	2009	0
Balaenopteridae	2	42.4763	4.3655	2	91.2241	130.291	,00	64.0049	1995	1
Balaenopteridae	2	42.4817	4.505	4	88.0529	119.437	,00	60.945	1996	1
Other cetacean	1	41.4503	2.59046	1	12.6378	42.082	1,00	0.809002	2009	0
Other cetacean	2	42.5	5.7	2	56.6054	66.7135	,00	15.3944	1995	0
Other cetacean	2	42.5133	3.785	4	50.4551	90.4479	,00	39.6198	1995	0
Other cetacean	2	42.5598	5.3009	1	65.1769	74.39	,00	36.6616	1995	0
Balaenopteridae	2	42.6	5.25	2	61.9656	71.1073	,00	42.3661	1995	1
Other cetacean	2	42.6	5.25	2	61.9656	71.1073	,00	42.3661	1995	0
Balaenopteridae	2	42.6	5.3167	2	61.0221	70.2424	,00	39.7298	1995	1
Balaenopteridae	2	42.6167	5.6333	2	47.4591	59.0245	,00	28.7504	1995	1
Balaenopteridae	2	42.6242	4.4448	2	75.0337	114.977	,00	76.4141	1995	1
Other cetacean	1	41.6098	2.8688	4	8.22051	72.9826	1,00	10.5836	2010	0
Other cetacean	2	42.6667	4.2333	1	77.9135	130.558	,00	78.4093	1995	0
Balaenopteridae	2	42.6667	5.0833	4	60.9218	69.725	,00	52.0628	1995	1
Other cetacean	2	42.6833	5.1667	4	56.2276	65.0928	,00	47.0344	1995	0
Other cetacean	2	42.6881	4.6658	2	65.933	93.6689	,00	73.5489	1995	0
Other cetacean	2	42.6967	4.2933	4	72.7381	123.857	,00	83.3373	1995	0
Other cetacean	2	42.6967	4.2933	4	72.7381	123.857	,00	83.3373	1995	0
Other cetacean	2	42.7	4.6333	2	64.8361	95.4002	,00	75.9266	1995	0
Balaenopteridae	2	42.7	5.2	4	53.5664	62.5	,00	44.1138	1995	1
Other cetacean	2	42.7	5.2	4	53.5664	62.5	,00	44.1138	1995	0
Other cetacean	2	42.7424	4.9377	2	59.9251	70.8625	,00	52.1087	1995	0
Balaenopteridae	2	42.7483	5.843	4	29.684	38.738	,00	12.5677	1996	1
Balaenopteridae	2	42.75	4.9333	2	59.2787	70.5407	,00	51.7412	1996	1
Other cetacean	2	42.75	5.1667	1	49.9563	58.8123	,00	40.9891	1995	0
Balaenopteridae	2	42.75	5.58	4	38.2828	51.5237	,00	23.5261	1995	1
Other cetacean	2	42.7567	4.8667	1	58.5181	74.4005	,00	55.3822	1995	0
Balaenopteridae	2	42.7622	6.1359	4	23.4329	41.552	,00	1.0679	1996	1
Other cetacean	2	42.7667	5.0667	2	52.9469	61.6001	,00	43.7007	1995	0
Other cetacean	2	42.7714	5.6785	4	31.5106	43.5859	,00	17.4246	1996	0
Other cetacean	2	42.7719	6.353	4	25.1786	54.8452	,00	11.1201	1996	0
Balaenopteridae	2	42.7728	5.6039	4	35.0728	48.2256	,00	20.4497	1996	1
Balaenopteridae	2	42.7759	5.3891	1	43.2367	52.429	,00	29.2446	1995	1
Balaenopteridae	2	42.7767	5.6383	4	32.9961	45.6462	,00	18.6428	1996	1
Other cetacean	2	42.7833	5.1	2	49.8138	58.5324	,00	40.7892	1995	0
Other cetacean	2	42.7833	5.6167	2	33.5073	46.5849	,00	18.9572	1996	0
Other cetacean	2	42.7833	5.6167	2	33.5073	46.5849	,00	18.9572	1996	0
Other cetacean	2	42.7833	5.1	2	49.8109	58.5294	,00	40.7861	1995	0
Balaenopteridae	2	42.8026	5.1091	2	47.6868	56.4012	,00	38.6554	1995	1
Balaenopteridae	2	42.8167	5.5	2	35.9869	49.9203	,00	20.8609	1995	1
Balaenopteridae	2	42.8167	5.7	2	26.4974	38.6644	,00	12.4104	1996	1
Balaenopteridae	2	42.8333	5.5	2	34.3628	48.315	,00	19.3564	1995	1
Balaenopteridae	2	42.8667	5.4833	1	31.5386	44.6629	,00	17.0348	1995	1
Other cetacean	2	42.8888	6.3575	4	15.5061	48.5497	,00	21.9055	1996	0
Balaenopteridae	2	42.92	6.25	4	7.75823	37.723	,00	20.1911	1995	1
Other cetacean	2	42.945	6.3667	4	12.8178	46.9262	,00	27.3879	1995	0
Other cetacean	2	43.0333	5.9167	1	3.93584	9.31963	1,00	16.3773	1995	0
