# Supplementary material for: Using opportunistic sightings to infer differential spatio-temporal use of western Mediterranean waters by the fin whale
Source: PeerJ. 2019 Mar 29;7:e6673. doi: 10.7717/peerj.6673 (PMC6442671; doi:10.7717/peerj.6673)
Supplement: Supplemental Information 2 [file peerj-07-6673-s002.xlsx]

## Sheet: Family
Family	Opportunistic sightings	%
Delphinidae	750	85.8124
Balaenopteridae	70	8.00915
Physeteridae	52	5.94966
Ziphiidae	2	0.228833
Total	874

## Sheet: Species
Species	Opportunistic sightings	%
Balaenoptera physalus	70	8.78294
Physeter macrocephalus	52	6.52447
Ziphius cavirostris	2	0.250941
Orcinus orca	2	0.250941
Globicephala melas	95	11.9197
Grampus griseus	50	6.27353
Delphinus delphis	136	17.064
Stenella coeruleoalba	331	41.5307
Tursiops truncantus	59	7.40276
Total	797
